# Supplementary material
Source: PubMed Central journal article supplement (PMC11062832)
Supplement: NIHMS1971579-supplement-4.pdf [file NIHMS1971579-supplement-4.pdf]

# Supplementary Figure S3

**A**

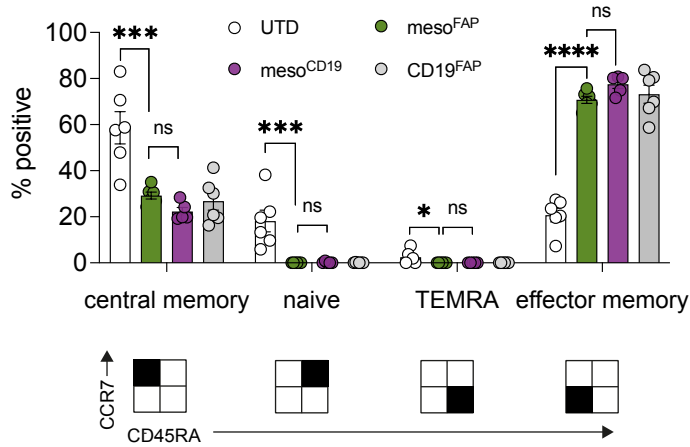

**B**

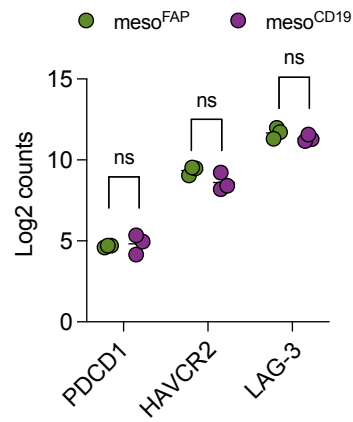

**C**

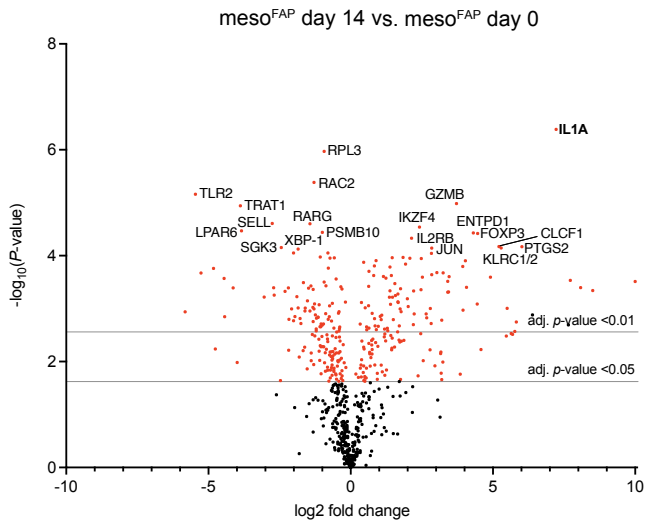

**D**

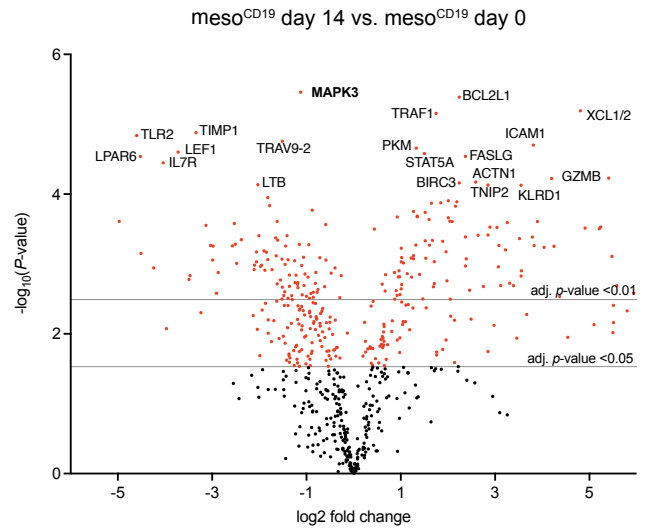

**E**

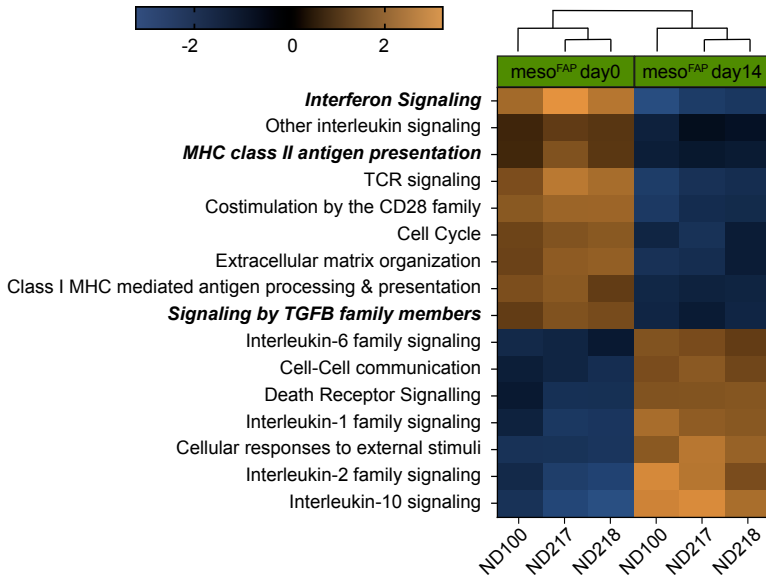

**F**

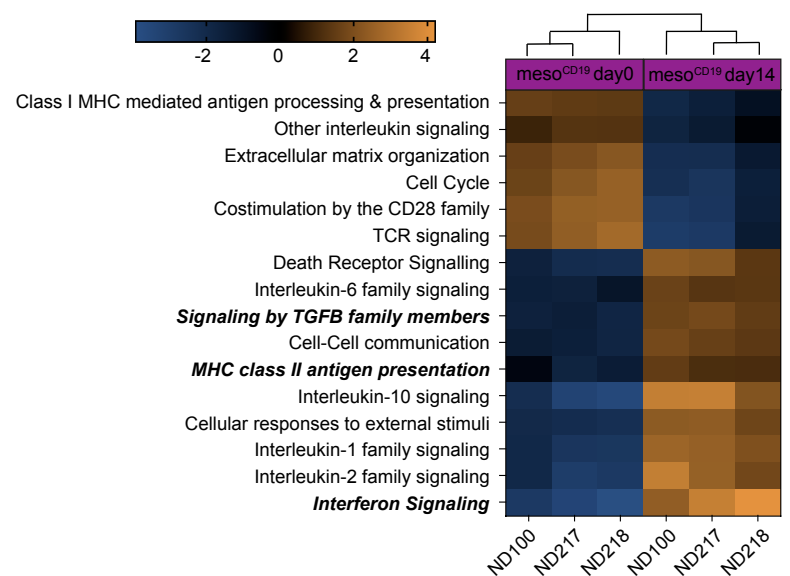

**Suppl. Fig. S3. ASPC-1 and CAF repeat stimulation initiates a different transcription profile of meso<sup>FAP</sup> and meso<sup>CD19</sup> CAR T-cells over time.** **A.** Memory phenotype of T-cells in the co-culture on day 20. **B.** Normalized gene expression values (Log2) of PDCD1 (PD1), HAVCR2 (TIM-3), and LAG-3 (LAG-3). **C-D.** Volcano plot of differential RNA expression of flowcytometric sorted (expressing the same level of mCherry) meso<sup>FAP</sup> (C) or meso<sup>CD19</sup> (D) CAR T-cells on day 0 versus day 14 co-cultured with AsPC-1 and CAF-1s. The top 20 genes are annotated. The grey horizontal line indicates an adjusted p-value of 0.05 and 0.001 respectively. **E-F.** NanoString pathway analysis of flowcytometric sorted meso<sup>FAP</sup> (E) or meso<sup>CD19</sup> (F) (expressing the same level of mCherry) on day 0 before co-culture and day 14 following co-culture and 3 repeat stimulations with AsPC-1 and CAF-1s at a 2:1:1 ratio (mesoFAP:AsPC-1:CAF) from 3 different healthy donors (ND100, 217 and 218). Data are shown as mean+/- SEM. ns: not significant as determined by paired two-tailed t-tests.
