# Supplementary material
Source: PubMed Central journal article supplement (PMC11062832)
Supplement: NIHMS1971579-supplement-5.pdf [file NIHMS1971579-supplement-5.pdf]

# Supplementary Figure S4

A

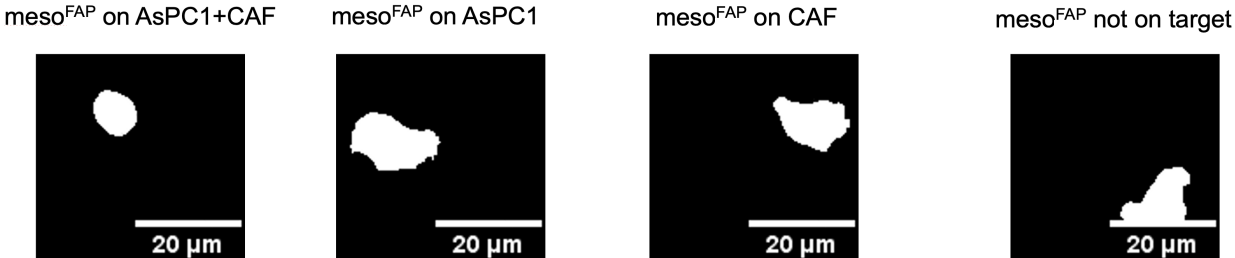

B

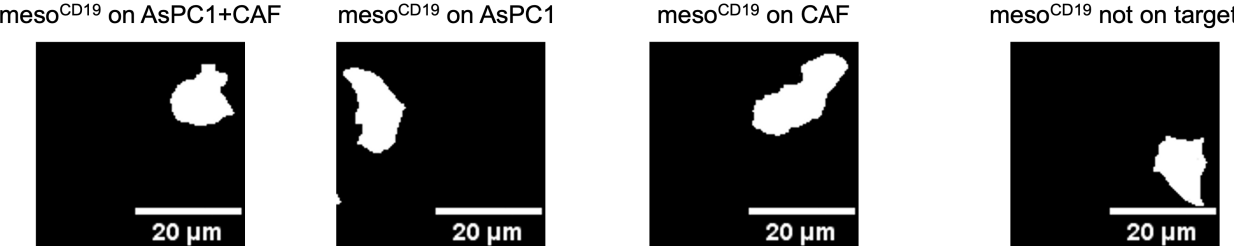

C

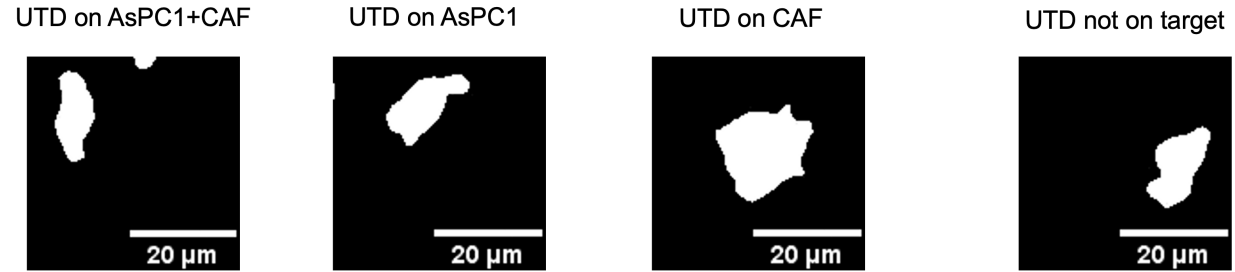

D

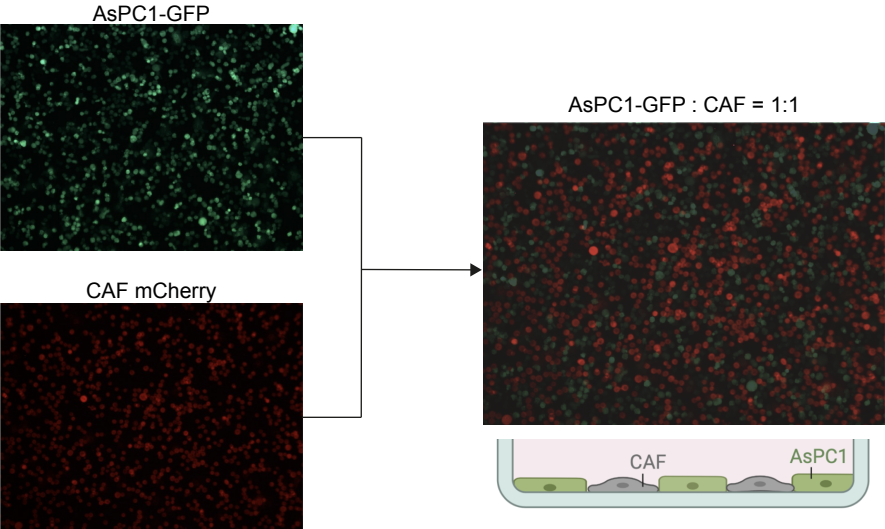

**Suppl. Fig. S4. Still frames from live cell microscopy videos demonstrating reduced edge dynamics of mesoFAP CAR T-cells compared to controls and target cell layer on flow chamber of acoustic microscopy. A–C.** Representative still frames from videos of sorted meso<sup>FAP</sup> CAR T-cells (A), meso<sup>CD19</sup> CAR T-cells (B), and UTDs (C) (all cells indicated in white) interacting with AsPC-1 + CAF, AsPC-1 alone, CAFs alone, or not on target (black). **D.** Representative fluorescent microscopy image including overlay of GFP-labelled AsPC-1 and mCherry-labelled CAF-1 cells in the flow chamber of acoustic microscopy. AsPC-1 to CAF ratio of 1:1 is indicated. Schematic created with BioRender.com.
