# Supplementary material
Source: PubMed Central journal article supplement (PMC11062832)
Supplement: NIHMS1971579-supplement-7.pdf [file NIHMS1971579-supplement-7.pdf]

## Supplementary Figure S6

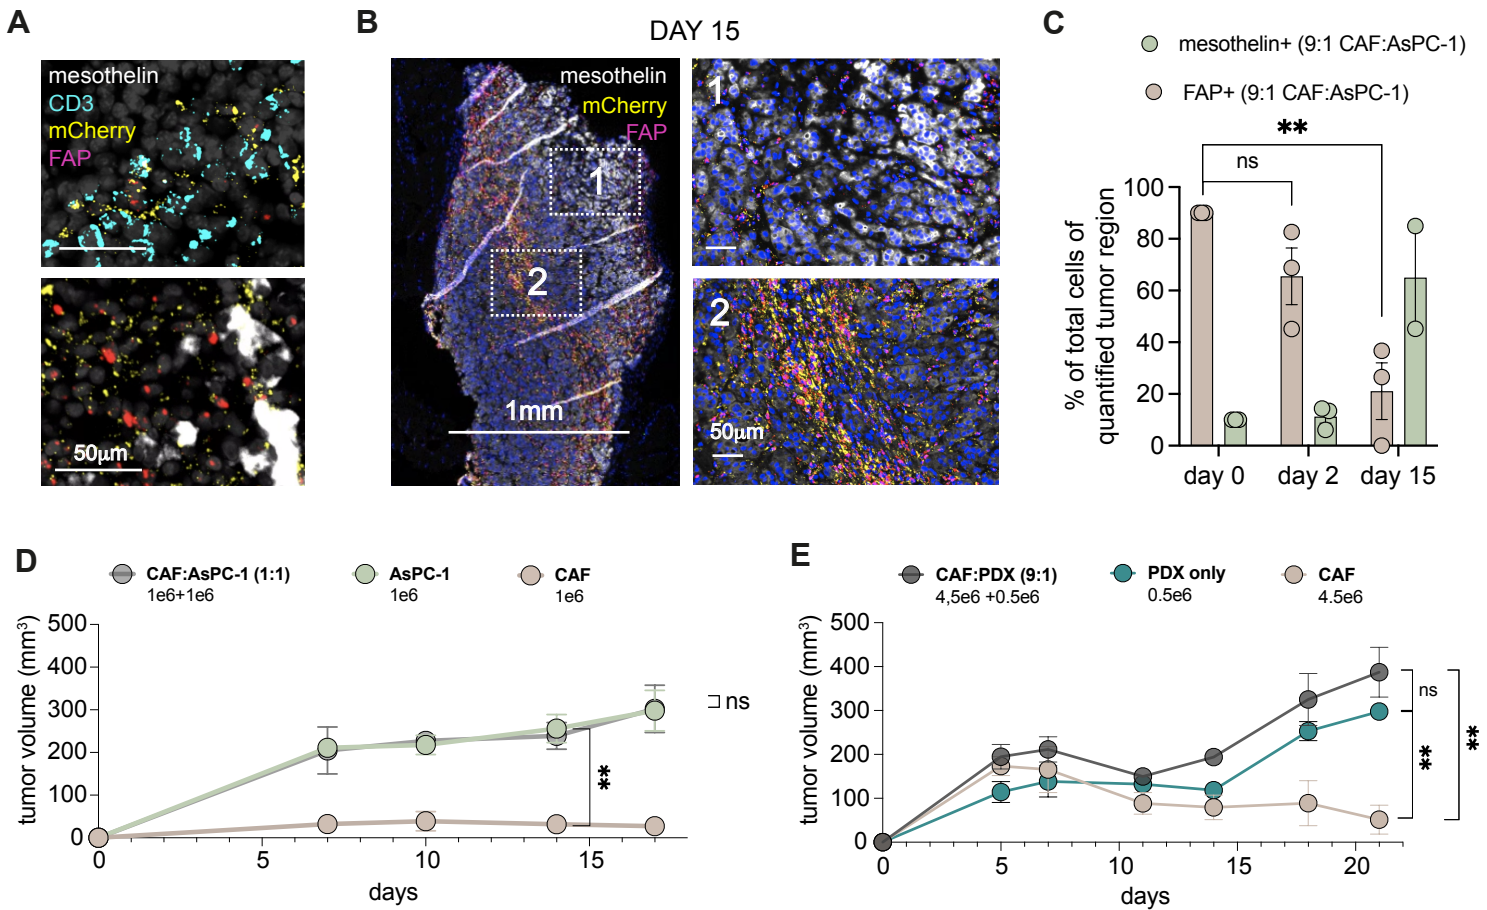

**Suppl. Fig. 6. Human CAF-1 cells do not expand in vivo in NSG mice in the presence or absence of AsPC-1 or PDX1294 cells.** **A.** Representative images on day 6 post meso<sup>FAP</sup> injection showing mCherry and FAP or mCherry and CD3 positive cells but no double positive cells for CD3 and FAP. **B-C.** NSG mice were injected with CAFs and AsPC-1 (9:1 ratio) or 1197 CAFs and PDX1294 (9:1 ratio) subcutaneously into the flank. **B.** Representative multiplex ISH IF images of day 15 after tumor injection. **C.** Quantification of FAP- and mesothelin-expressing cells over time. **D.** Average tumor volumes as measured by caliper from AsPC-1 cells mixed with CAF-1 cells (1:1 ratio), CAF-1 cells alone, and AsPC-1 cells alone injected subcutaneously into the flank of NSG mice. **E.** PDX 1294 cells and CAF-1 cells (1:9 ratio), CAF-1 cells alone, and PDX 1294 cells alone injected subcutaneously into the flank of NSG mice. Data represent mean  $\pm$  SEM. Stars indicate significance as determined by unpaired two-tailed t-tests of biological triplicates. \*\*  $p < 0.01$ , \*\*\*  $p < 0.0001$ . ns: not significant (panels C, I, J) Measurements as average tumor volume values (mean  $\pm$  SEM,  $n = 3-5$ , 2-way ANOVA, \*  $p < 0.05$ ; \*\*  $p < 0.01$ ; \*\*\*  $p < 0.001$ ; ns = not significant; panels D, E, L). meso: mesothelin, IF: immunofluorescence, IHC: immunohistochemistry
